# Supplementary material for: Alteration of Fatty Acid Profile in Fragile X Syndrome
Source: MDPI journal article supplement (doi:10.3390/ijms231810815), 2022-09-16
Supplement: s1 [file s1]

Table S1. FA profile in male group

| Fatty acids          | Fragile X ( <i>n</i> = 21)<br>Median [25% and 75%<br>percentile] | Healthy Control ( <i>n</i> = 21)<br>Median [25% and 75%<br>percentile] | Adjusted<br><i>P</i> -Value |
|----------------------|------------------------------------------------------------------|------------------------------------------------------------------------|-----------------------------|
| C14:0                | 7.8 [6.7, 9.1]                                                   | 9.6 [7.4, 11.00]                                                       | <b>0.0213</b>               |
| C16:0                | 488.2 [444.8, 529.1]                                             | 592.2 [536.6, 684.1]                                                   | <b>0.0006</b>               |
| C18:0                | 362.3 [274.7, 396.9]                                             | 382.4 [326.4, 461.1]                                                   | 0.1038                      |
| SFA total            | 849.3 [745.1, 957.5]                                             | 975.1 [883.0, 1094.0]                                                  | <b>0.0011</b>               |
| C16:1 ω-7            | 6.4 [5.6, 8.3]                                                   | 9.9 [8.1, 14.0]                                                        | <b>0.0006</b>               |
| C18:1 ω-9            | 205.6 [181.9, 239.2]                                             | 240.7 [216.2, 253.3]                                                   | <b>0.0137</b>               |
| C18:1 ω-7            | 20.8 [16.8, 26.0]                                                | 26.7 [20.4, 31.2]                                                      | <b>0.0058</b>               |
| MUFA total           | 232.5 [202.2, 272.8]                                             | 272.8 [245.0, 300.5]                                                   | <b>0.0084</b>               |
| C18:2 ω-6            | 371.4 [308.3, 433.6]                                             | 456.8 [391.7, 522.9]                                                   | <b>0.0006</b>               |
| C20:3 ω-6            | 55.0 [38.5, 75.6]                                                | 65.5 [55.1, 86.6]                                                      | <b>0.0362</b>               |
| C20:4 ω-6            | 182.6 [152.0, 255.7]                                             | 213.9 [173.6, 282.6]                                                   | <b>0.0446</b>               |
| ω-6 total            | 621.3 [527.8, 716.7]                                             | 757.2 [650.1, 868.4]                                                   | <b>0.0009</b>               |
| C18:3 ω-3            | 2.8 [2.3, 3.8]                                                   | 3.8 [2.4, 4.3]                                                         | 0.1055                      |
| C20:5 ω-3            | 6.5 [4.4, 10.0]                                                  | 12.5 [6.9, 15.4]                                                       | <b>0.0037</b>               |
| C22:5 ω-3            | 15.6 [11.5, 19.4]                                                | 17.1 [15.4, 22.5]                                                      | 0.1298                      |
| C22:6 ω-3            | 43.2 [34.4, 55.0]                                                | 58.1 [37.4, 80.8]                                                      | <b>0.0289</b>               |
| ω-3 total            | 70.8 [57.1, 85.0]                                                | 93.3 [68.2, 127.0]                                                     | <b>0.0137</b>               |
| PUFA total           | 679.2 [600.6, 799.6]                                             | 842.4 [727.0, 969.0]                                                   | <b>0.0010</b>               |
| ω-3 / ω-6            | 0.1 [0.1, 0.1]                                                   | 0.1 [0.1, 0.1]                                                         | 0.3526                      |
| C20:5/C18:3(EPA/ALA) | 2.4 [1.6, 3.7]                                                   | 3.1 [2.7, 4.0]                                                         | 0.0505                      |
| C22:5/C20:5(DPA/EPA) | 2.5 [1.4, 3.2]                                                   | 1.5 [1.2, 2.2]                                                         | <b>0.0336</b>               |
| C22:6/C22:5(DHA/DPA) | 2.7 [2.2, 3.3]                                                   | 3.3 [2.3, 4.2]                                                         | 0.1590                      |
| C22:6/C20:5(DHA/EPA) | 6.6 [3.6, 10.2]                                                  | 5.3 [2.7, 7.4]                                                         | 0.1298                      |
| 20:3/18:2            | 0.2 [0.1, 0.2]                                                   | 0.1 [0.1, 0.2]                                                         | 0.5916                      |
| 20:4/20:3            | 3.8 [2.6, 4.5]                                                   | 3.3 [2.6, 4.5]                                                         | 0.4474                      |

Table S2. FA profile in adult cohort

| Fatty acids          | Fragile X ( <i>n</i> = 21)<br>Median [25% and 75%<br>percentile] | Healthy Control ( <i>n</i> = 21)<br>Median [25% and 75%<br>percentile] | Adjusted<br><i>P</i> -Value |
|----------------------|------------------------------------------------------------------|------------------------------------------------------------------------|-----------------------------|
| C14:0                | 8.1 [6.3, 8.8]                                                   | 9.5 [7.2, 10.7]                                                        | 0.1012                      |
| C16:0                | 466.9 [414.8, 547.2]                                             | 619.7 [574.9, 684.1]                                                   | <b>0.0004</b>               |
| C18:0                | 312.9 [250.4, 389.3]                                             | 382.4 [301.8, 461.1]                                                   | <b>0.0492</b>               |
| SFA total            | 797.1 [680.3, 972.8]                                             | 1041.0 [903.5, 1147.0]                                                 | <b>0.0029</b>               |
| C16:1 ω-7            | 5.9 [5.6, 7.7]                                                   | 11.6 [8.3, 14.8]                                                       | <b>0.0057</b>               |
| C18:1 ω-9            | 189.7 [152.1, 233.8]                                             | 240.7 [216.2, 256.4]                                                   | <b>0.0153</b>               |
| C18:1 ω-7            | 22.4 [17.6, 27.1]                                                | 28.5 [24.0, 32.3]                                                      | <b>0.0032</b>               |
| MUFA total           | 221.1 [178.6, 268.4]                                             | 274.7 [261.2, 298.6]                                                   | <b>0.0104</b>               |
| C18:2 ω-6            | 324.0 [279.4, 406.1]                                             | 500.6 [445.2, 532.0]                                                   | <b>0.0004</b>               |
| C20:3 ω-6            | 53.6 [38.2, 74.0]                                                | 67.8 [55.3, 84.8]                                                      | 0.0586                      |
| C20:4 ω-6            | 175.3 [124.8, 238.3]                                             | 251.0 [177.1, 322.1]                                                   | <b>0.0082</b>               |
| ω-6 total            | 549.8 [476.6, 696.9]                                             | 768.8 [709.5, 912.8]                                                   | <b>0.0004</b>               |
| C18:3 ω-3            | 3.0 [2.2, 4.8]                                                   | 4.1 [2.9, 6.6]                                                         | 0.0942                      |
| C20:5 ω-3            | 7.1 [6.0, 13.0]                                                  | 14.3 [12.3, 16.3]                                                      | <b>0.0057</b>               |
| C22:5 ω-3            | 16.8 [11.4, 19.7]                                                | 18.8 [16.6, 24.1]                                                      | 0.138                       |
| C22:6 ω-3            | 44.1 [32.1, 57.7]                                                | 67.8 [37.9, 81.4]                                                      | <b>0.0143</b>               |
| ω-3 total            | 74.2 [55.1, 100.8]                                               | 104.1 [85.2, 134.0]                                                    | <b>0.0082</b>               |
| PUFA total           | 608.3 [542.0, 803.5]                                             | 872.8 [811.1, 1074.0]                                                  | <b>0.0004</b>               |
| ω-3 / ω-6            | 0.1 [0.1, 0.2]                                                   | 0.1 [0.1, 0.1]                                                         | 0.5893                      |
| C20:5/C18:3(EPA/ALA) | 2.9 [1.9, 4.5]                                                   | 3.6 [3.0, 4.2]                                                         | 0.1472                      |
| C22:5/C20:5(DPA/EPA) | 1.5 [1.1, 2.7]                                                   | 1.4 [1.1, 1.6]                                                         | 0.138                       |
| C22:6/C22:5(DHA/DPA) | 2.8 [2.4, 3.2]                                                   | 3.6 [2.4, 4.3]                                                         | 0.1568                      |
| C22:6/C20:5(DHA/EPA) | 3.2 [2.8, 5.6]                                                   | 4.3 [3.6, 5.3]                                                         |                             |
| 20:3/18:2            | 0.2 [0.1, 0.2]                                                   | 0.1 [0.1, 0.2]                                                         | 0.1963                      |
| 20:4/20:3            | 3.2 [2.5, 4.5]                                                   | 3.5 [2.7, 4.9]                                                         | 0.3381                      |

Table S3. FA profile in children cohort

| Fatty acids          | Fragile X ( <i>n</i> = 9) Median<br>[25% and 75%<br>percentile] | Healthy Control ( <i>n</i> = 9)<br>Median [25% and 75%<br>percentile] | Adjusted<br><i>P</i> -Value |
|----------------------|-----------------------------------------------------------------|-----------------------------------------------------------------------|-----------------------------|
| C14:0                | 9.1 [7.2, 9.3]                                                  | 9.7 [8.9, 11.7]                                                       | 0.7903                      |
| C16:0                | 501.9 [472.3, 537.4]                                            | 536.6 [503.,4, 561.2]                                                 | 0.8341                      |
| C18:0                | 380.0 [353.4, 456.7]                                            | 373.3 [340.8, 401.3]                                                  | 0.8612                      |
| SFA total            | 911.7 [834.5, 980.4]                                            | 904.4 [866.0, 972.8]                                                  | 0.9785                      |
| C16:1 ω-7            | 6.7 [5.6, 10.1]                                                 | 9.2 [7.4, 11.2]                                                       | 0.7903                      |
| C18:1 ω-9            | 220.2 [184.9, 279.1]                                            | 245.8 [207.5, 260.9]                                                  | 0.8612                      |
| C18:1 ω-7            | 17.0 [15.2, 21.6]                                               | 18.8 [16.2, 24.4]                                                     | 0.8612                      |
| MUFA total           | 249.8 [205.6, 307.1]                                            | 274.1 [233.0, 294.2]                                                  | 0.8612                      |
| C18:2 ω-6            | 421.2 [359.8, 497.7]                                            | 391.7 [359.7, 436.5]                                                  | 0.8612                      |
| C20:3 ω-6            | 56.92 [45.7, 79.0]                                              | 67.44 [45.9, 85.1]                                                    | 0.8612                      |
| C20:4 ω-6            | 193.4 [173.0, 222.8]                                            | 182.2 [139.8, 245.2]                                                  | 1                           |
| ω-6 total            | 704.3 [588.3, 778.0]                                            | 650.1 [568.1, 729.4]                                                  | 0.9908                      |
| C18:3 ω-3            | 2.6 [1.9, 3.4]                                                  | 2.4 [2.2, 3.0]                                                        | 0.9785                      |
| C20:5 ω-3            | 4.39 [4.3, 7.2]                                                 | 7.2 [4.4, 13.3]                                                       | 0.8341                      |
| C22:5 ω-3            | 15.8 [12.2, 19.2]                                               | 16.2 [11.7, 19.2]                                                     | 0.9785                      |
| C22:6 ω-3            | 42.1 [32.9, 55.6]                                               | 45.8 [31.9, 62.2]                                                     | 1                           |
| ω-3 total            | 72.1 [56.0, 76.1]                                               | 69.0 [59.7, 88.2]                                                     | 0.9785                      |
| PUFA total           | 776.4 [666.3, 841.2]                                            | 727.0 [628.3, 810.9]                                                  | 0.8983                      |
| ω-3 / ω-6            | 0.1 [0.1,0.1]                                                   | 0.1 [0.1, 0.1]                                                        | 0.8341                      |
| C20:5/C18:3(EPA/ALA) | 2.2 [1.6, 2.9]                                                  | 3.1 [2.4, 4.7]                                                        | 0.7903                      |
| C22:5/C20:5(DPA/EPA) | 2.5 [2.2, 4.2]                                                  | 2.5 [1.5, 3.0]                                                        | 0.8341                      |
| C22:6/C22:5(DHA/DPA) | 2.5 [2.1, 4.4]                                                  | 3.1 [1.9, 4.1]                                                        | 1                           |
| C22:6/C20:5(DHA/EPA) | 10.0 [5.5, 13.3]                                                | 6.4 [5.1, 9.4]                                                        | 0.8341                      |
| 20:3/18:2            | 0.1 [0.1, 0.2]                                                  | 0.2 [0.1, 0.2]                                                        | 0.8612                      |
| 20:4/20:3            | 3.7 [2.6, 4.2]                                                  | 3.0 [2.4, 3.5]                                                        | 0.8341                      |

Table S4. FA profile in adolescence cohort

| Fatty acids          | Fragile X ( <i>n</i> = 4) Median<br>[25% and 75%<br>percentile] | Healthy Control ( <i>n</i> = 4)<br>Median [25% and 75%<br>percentile] | Adjusted<br><i>P</i> -Value |
|----------------------|-----------------------------------------------------------------|-----------------------------------------------------------------------|-----------------------------|
| C14:0                | 7.4 [7.2, 9.3]                                                  | 8.3 [6.0, 10.9]                                                       | 0.9723                      |
| C16:0                | 495.6 [454.4, 520.5]                                            | 560.5 [518.4, 596.1]                                                  | 0.5611                      |
| C18:0                | 386.3 [344.1, 451.2]                                            | 451.9 [446.7, 469.2]                                                  | 0.5611                      |
| SFA total            | 890.7 [805.9, 979.5]                                            | 1031.0 [978.4, 1059.0]                                                | 0.5611                      |
| C16:1 ω-7            | 8.0 [5.8, 8.4]                                                  | 8.7 [8.3, 10.0]                                                       | 0.5611                      |
| C18:1 ω-9            | 229.8 [175.4, 264.2]                                            | 245.3 [236.8, 286.8]                                                  | 0.5611                      |
| C18:1 ω-7            | 20.8 [17.2, 25.0]                                               | 22.2 [20.6, 29.0]                                                     | 0.6813                      |
| MUFA total           | 258.9 [199.1, 278.5]                                            | 275.1 [267.2, 325.2]                                                  | 0.5611                      |
| C18:2 ω-6            | 395.9 [362.9, 445.4]                                            | 475.5 [411.9, 507.7]                                                  | 0.5611                      |
| C20:3 ω-6            | 53.38 [31.9, 71.7]                                              | 63.3 [60.7, 82.8]                                                     | 0.5611                      |
| C20:4 ω-6            | 181.8 [155.2, 290.0]                                            | 205.2 [185.4, 209.9]                                                  | 0.6813                      |
| ω-6 total            | 616.3 [565.4, 806.4]                                            | 743.1 [676.8, 782.5]                                                  | 0.6813                      |
| C18:3 ω-3            | 2.3 [2.0, 3.4]                                                  | 2.4 [2.3, 3.9]                                                        | 0.6813                      |
| C20:5 ω-3            | 3.5 [3.0, 7.9]                                                  | 5.9 [4.0, 6.6]                                                        | 0.6813                      |
| C22:5 ω-3            | 12.1 [9.9, 21.4]                                                | 14.7 [11.4, 16.1]                                                     | 0.787                       |
| C22:6 ω-3            | 45.7 [38.4, 57.3]                                               | 51.0 [44.1, 70.2]                                                     | 0.6813                      |
| ω-3 total            | 68.5 [55.8, 82.4]                                               | 74.3 [63.1, 95.3]                                                     | 0.787                       |
| PUFA total           | 684.9 [621.3, 888.8]                                            | 812.6 [744.7, 877.8]                                                  | 0.6813                      |
| ω-3 / ω-6            | 0.1 [0.1, 0.1]                                                  | 0.1 [0.1, 0.1]                                                        | 1                           |
| C20:5/C18:3(EPA/ALA) | 1.6 [1.4, 2.3]                                                  | 1.9 [1.4, 2.8]                                                        | 1                           |
| C22:5/C20:5(DPA/EPA) | 3.2 [2.8, 3.6]                                                  | 2.5 [2.0, 3.7]                                                        | 0.6813                      |
| C22:6/C22:5(DHA/DPA) | 3.3 [2.3, 5.8]                                                  | 3.8 [3.3, 4.7]                                                        | 0.6813                      |
| C22:6/C20:5(DHA/EPA) | 11.6 [6.7, 18.6]                                                | 9.8 [7.6, 13.7]                                                       | 0.787                       |
| 20:3/18:2            | 0.1 [0.1, 0.2]                                                  | 0.1 [0.1, 0.2]                                                        | 0.787                       |
| 20:4/20:3            | 3.9 [3.0, 6.2]                                                  | 3.1 [2.4, 3.5]                                                        | 0.5611                      |

Table S5. FA profile in Argentinian group

| Fatty acids          | Fragile X (n = 23)<br>Median [25% and 75%<br>percentile] | Healthy Control (n = 23)<br>Median [25% and 75%<br>percentile] | Adjusted <i>P</i> -<br>Value |
|----------------------|----------------------------------------------------------|----------------------------------------------------------------|------------------------------|
| C14:0                | 8.5 [7.1, 9.2]                                           | 9.8 [8.7, 11.1]                                                | <b>0.0149</b>                |
| C16:0                | 504.3 [456.5, 536.1]                                     | 572.0 [536.6, 625.5]                                           | <b>0.0046</b>                |
| C18:0                | 377.4 [356.4, 435.8]                                     | 406.3 [373.3, 463.5]                                           | 0.1646                       |
| SFA total            | 899.9 [826.3, 978.1]                                     | 982.1 [934.9, 1094.0]                                          | <b>0.0149</b>                |
| C16:1 ω-7            | 6.9 [5.6, 8.8]                                           | 9.9 [8.3, 11.6]                                                | <b>0.0046</b>                |
| C18:1 ω-9            | 215.9 [183.7, 248.7]                                     | 246.6 [234.8, 264.8]                                           | <b>0.0194</b>                |
| C18:1 ω-7            | 20.2 [16.6, 23.3]                                        | 22.3 [19.3, 27.7]                                              | 0.1296                       |
| MUFA total           | 242.3 [208.8, 282.6]                                     | 279.3 [265.3, 306.0]                                           | <b>0.0209</b>                |
| C18:2 ω-6            | 389.4 [326.5, 449.9]                                     | 451.7 [382.0, 490.9]                                           | <b>0.0475</b>                |
| C20:3 ω-6            | 57.6 [51.9, 77.2]                                        | 67.8 [59.3, 86.6]                                              | 0.1539                       |
| C20:4 ω-6            | 195.6 [172.9, 236.1]                                     | 213.9 [182.2, 271.9]                                           | 0.2949                       |
| ω-6 total            | 660.4 [556.9, 729.6]                                     | 733.4 [667.2, 783.1]                                           | <b>0.0411</b>                |
| C18:3 ω-3            | 2.4 [1.9, 3.3]                                           | 2.5 [2.3, 3.8]                                                 | 0.1790                       |
| C20:5 ω-3            | 4.8 [4.0, 9.2]                                           | 9.8 [5.8, 14.3]                                                | <b>0.0238</b>                |
| C22:5 ω-3            | 15.6 [11.5, 19.4]                                        | 17.0 [14.0, 21.3]                                              | 0.4769                       |
| C22:6 ω-3            | 47.6 [36.8, 60.6]                                        | 58.1 [42.0, 70.0]                                              | 0.2075                       |
| ω-3 total            | 72.3 [57.6, 85.0]                                        | 93.3 [61.6, 104.1]                                             | 0.1689                       |
| PUFA total           | 732.4 [631.8, 815.9]                                     | 822.5 [737.5, 884.1]                                           | <b>0.0475</b>                |
| ω-3 / ω-6            | 0.1 [0.1, 0.1]                                           | 0.1 [0.1, 0.1]                                                 | 0.4129                       |
| C20:5/C18:3(EPA/ALA) | 2.3 [1.6, 3.1]                                           | 3.1 [2.7, 4.5]                                                 | <b>0.0361</b>                |
| C22:5/C20:5(DPA/EPA) | 2.8 [2.3, 3.7]                                           | 1.8 [1.4, 2.7]                                                 | <b>0.0149</b>                |
| C22:6/C22:5(DHA/DPA) | 2.8 [2.3, 4.0]                                           | 3.5 [2.4, 4.0]                                                 | 0.3577                       |
| C22:6/C20:5(DHA/EPA) | 8.4 [6.6, 11.4]                                          | 5.8 [4.8, 8.0]                                                 | <b>0.0473</b>                |
| 20:3/18:2            | 0.2 [0.1, 0.2]                                           | 0.2 [0.1, 0.2]                                                 | 0.8783                       |
| 20:4/20:3            | 3.7 [2.6, 4.4]                                           | 3.1 [2.6, 3.6]                                                 | 0.2889                       |

Table S6. FA profile in French Canadian group

| Fatty acids          | Fragile X ( <i>n</i> = 11)<br>Median [25% and 75%<br>percentile] | Healthy Control ( <i>n</i> = 11)<br>Median [25% and 75%<br>percentile] | <i>Adjusted P-Value</i> |
|----------------------|------------------------------------------------------------------|------------------------------------------------------------------------|-------------------------|
| C14:0                | 7.3 [6.1, 10.0]                                                  | 7.4 [3.9, 10.4]                                                        | 0.7698                  |
| C16:0                | 417.2 [351.1, 523.9]                                             | 592.2 [527.0, 684.1]                                                   | <b>0.0394</b>           |
| C18:0                | 253.6 [229.5, 312.4]                                             | 301.8 [281.6, 352.8]                                                   | 0.1341                  |
| SFA total            | 682.6 [604.7, 843.5]                                             | 903.5 [815.5, 1041.0]                                                  | 0.0534                  |
| C16:1 ω-7            | 5.9 [5.6, 7.3]                                                   | 14.0 [5.5, 14.9]                                                       | 0.2454                  |
| C18:1 ω-9            | 182.2 [148.7, 225.1]                                             | 216.2 [150.3, 231.8]                                                   | 0.4936                  |
| C18:1 ω-7            | 22.4 [16.7, 27.2]                                                | 30.3 [28.3, 34.2]                                                      | <b>0.0101</b>           |
| MUFA total           | 212.9 [176.2, 260.2]                                             | 265.4 [186.0, 274.7]                                                   | 0.2454                  |
| C18:2 ω-6            | 307.6 [271.4, 387.9]                                             | 500.6 [438.7, 522.9]                                                   | <b>0.0309</b>           |
| C20:3 ω-6            | 38.9 [36.5, 64.3]                                                | 57.0 [44.2, 83.0]                                                      | 0.2454                  |
| C20:4 ω-6            | 170.3 [95.32, 184.6]                                             | 180.6 [163.2, 332.9]                                                   | 0.1341                  |
| ω-6 total            | 519.5 [430.8, 620.7]                                             | 757.2 [628.8, 912.8]                                                   | <b>0.0309</b>           |
| C18:3 ω-3            | 4.1 [2.8, 5.9]                                                   | 5.8 [4.1, 7.4]                                                         | 0.2454                  |
| C20:5 ω-3            | 10.2 [6.6, 19.7]                                                 | 14.5 [12.6, 33.7]                                                      | 0.1425                  |
| C22:5 ω-3            | 14.3 [10.5, 19.8]                                                | 18.8 [15.9, 24.6]                                                      | 0.2605                  |
| C22:6 ω-3            | 39.5 [25.3, 44.4]                                                | 80.8 [37.3, 98.8]                                                      | 0.1341                  |
| ω-3 total            | 66.3 [44.0, 98.3]                                                | 133.9 [73.3, 142.9]                                                    | <b>0.0505</b>           |
| PUFA total           | 593.7 [474.7, 698.3]                                             | 842.4 [702.1, 1074.0]                                                  | <b>0.0309</b>           |
| ω-3 / ω-6            | 0.1 [0.1, 0.2]                                                   | 0.1 [0.1, 0.2]                                                         | 0.8779                  |
| C20:5/C18:3(EPA/ALA) | 2.6 [1.4, 4.4]                                                   | 3.0 [2.2, 3.7]                                                         | 0.8779                  |
| C22:5/C20:5(DPA/EPA) | 1.2 [1.0, 1.9]                                                   | 1.2 [1.1, 1.5]                                                         | 0.9452                  |
| C22:6/C22:5(DHA/DPA) | 2.6 [2.2, 2.9]                                                   | 2.5 [2.3, 5.3]                                                         | 0.4936                  |
| C22:6/C20:5(DHA/EPA) | 3.5 [2.8, 4.7]                                                   | 2.7 [2.4, 8.1]                                                         | 0.8779                  |
| 20:3/18:2            | 0.2 [0.1, 0.2]                                                   | 0.1 [0.1, 0.2]                                                         | 0.4936                  |
| 20:4/20:3            | 3.1 [2.5, 4.5]                                                   | 3.8 [2.7, 5.8]                                                         | 0.4936                  |
